# Supplementary material
Source: Springer Nature journal article supplement (https://www.springermedizin.de/resource/supplementary/12943_2012_1133_MOESM13_ESM.pdf/9552566)

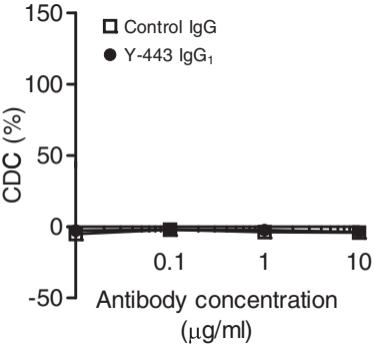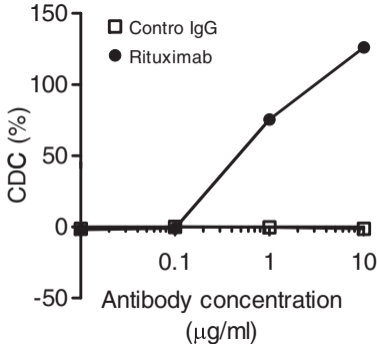

Supplement: MOESM13 [file 9552566]
